# Supplementary material for: Resolving misaligned spatial data with integrated species distribution models
Source: PubMed Central journal article supplement — Ecology. 2019 May 13;100(6):e02709. doi: 10.1002/ecy.2709 (PMC6851831; doi:10.1002/ecy.2709), 2019-05-13
Supplement: ECY-100-na-s003.pdf [file ECY-100-na-s003.pdf]

**JOURNAL PUBLICATION CITATION:** Pacifici, K., B. J. Reich, D. A. W. Miller, and B. S. Pease. 2019. Resolving misaligned spatial data with integrated species distribution models. *Ecology*.

---

## **Data S1**

**R and BUGS code to implement integrated species distribution models accounting for spatial misalignment using Breeding Bird Atlas and eBird data.**

---

## **Authors [of the material provided in DataS1.zip]**

Krishna Pacifici  
Department of Forestry and Environmental Resources  
North Carolina State University  
Raleigh, North Carolina 27695  
jkpacifi@ncsu.edu

Brian J. Reich  
Department of Statistics  
North Carolina State University  
Raleigh, North Carolina 27695  
bjreich@ncsu.edu

David A. W. Miller  
Department of Ecosystem Science and Management  
Pennsylvania State University  
University Park, Pennsylvania 16802  
Dxm84@psu.edu

Brent S. Pease  
Department of Forestry and Environmental Resources  
North Carolina State University  
Raleigh, North Carolina 27695  
bspease@ncsu.edu

---

## **File list (files found within DataS1.zip)**

BBA\_cleaned.csv

eBird\_grid.csv  
GridCovariates\_CoS.csv  
GridCovariates\_No\_CoS.csv  
grid1.wbnb.Rdata  
high.Rdata  
low.Rdata  
coords.Rdata  
EE.Rdata  
YY.Rdata

## Description

- BBA\_cleaned.csv - Breeding Bird Atlas data from Pennsylvania, USA for black-throated blue warblers (*Setophaga caerulescens*). This serves as the primary data source.
  - eBird\_grid.csv - eBird data for black-and-white warblers in Pennsylvania, USA summarized within misaligned grid cells.
  - GridCovariates\_CoS.csv - Grid information containing coordinates for each grid size as well as average forest cover for each grid cell (covariate information). This file should be used with the **Change of Support** models.
  - GridCovariates\_No\_CoS.csv - Grid information containing coordinates for each grid size as well as average forest cover for each grid cell (covariate information). This file should be used with **No Change of Support** models.
  - grid1.wbnb.Rdata - Spatial neighborhood information for the finest grid.
  - high.Rdata - This file is for Change of Support models. Informs BUGS how many finer grid cells are within coarser grid cells.
  - low.Rdata - This file is for Change of Support models. Informs BUGS how many finer grid cells are within coarser grid cells.
  - coords.Rdata - This file is for the covariate model. Coordinates of eBird grid cells.
  - EE.Rdata - This file is for the covariate model. Smoothed eBird effort using `mgcv::gam`
  - YY.Rdata - This file is for the covariate model. Smoothed eBird counts using `mgcv::gam`
-
